# Supplementary material
Source: PubMed Central journal article supplement (PMC9929636)
Supplement: EMBJ-42-e111549-s005.pdf [file EMBJ-42-e111549-s005.pdf]

## Expanded View Figures

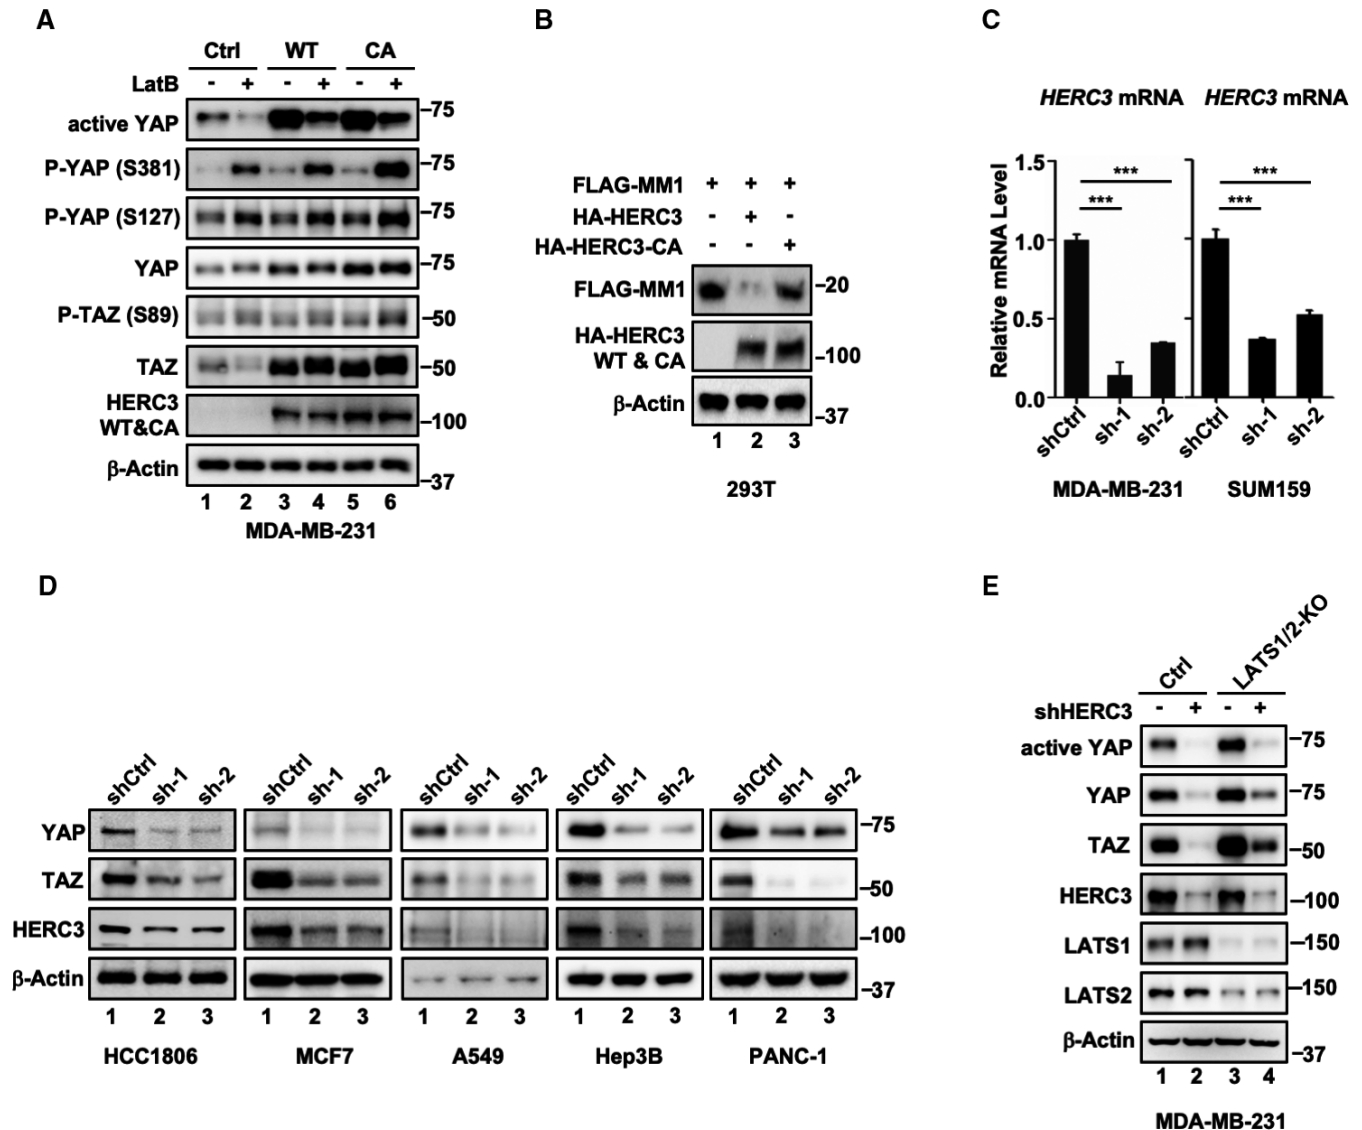

**Figure EV1. HERC3 regulates the stability and transcriptional responses of YAP/TAZ.**

- A HERC3 and HERC3-CA reverse the reduction in the YAP/TAZ levels induced by LatB. MDA-MB-231 cells stably expressing HERC3 or HERC3-CA were cultured in a medium with or without LatB (1  $\mu$ g/ml) for 30 min. Cells were harvested for Western blotting analysis with appropriate antibodies as indicated.
- B HERC3, but not HERC3-CA, causes MM1 degradation. HEK293T cells were transfected with expression plasmids for HA-HERC3, HA-HERC3-CA, and FLAG-MM1 as indicated. Cells were harvested 24 h post-transfection and subjected to Western blotting analysis with FLAG, HA, and  $\beta$ -actin antibodies.
- C HERC3 is efficiently knocked down by shRNA. Total mRNA levels of HERC3 in control or HERC3-deficient MDA-MB-231 cells and SUM159 cells were analyzed by qRT-PCR using primers specific to the indicated target gene. Data are shown as mean  $\pm$  SEM;  $n = 3$  biological replicates. Statistical analysis was performed using two-tailed Student's  $t$ -test. \*\*\* $P < 0.001$ .
- D Depletion of HERC3 decreases the steady-state levels of YAP/TAZ. HCC1806, MCF7, A549, Hep3B, and PANC-1 cells were stably expressing shCtrl (Control shRNA) and sh-1 and sh-2 (shRNAs against HERC3). Western blotting was carried out to detect levels of YAP, TAZ, HERC3, and  $\beta$ -actin with appropriate antibodies as indicated.
- E Depletion of HERC3 decreases the steady-state levels of YAP/TAZ in LATS1/2-KO cells. Western blotting was done as described in panel D. LATS1/2-KO, double knockout of LATS1 and LATS2 in MDA-MB-231 cells stably expressing shCtrl and shHERC3.

Source data are available online for this figure.

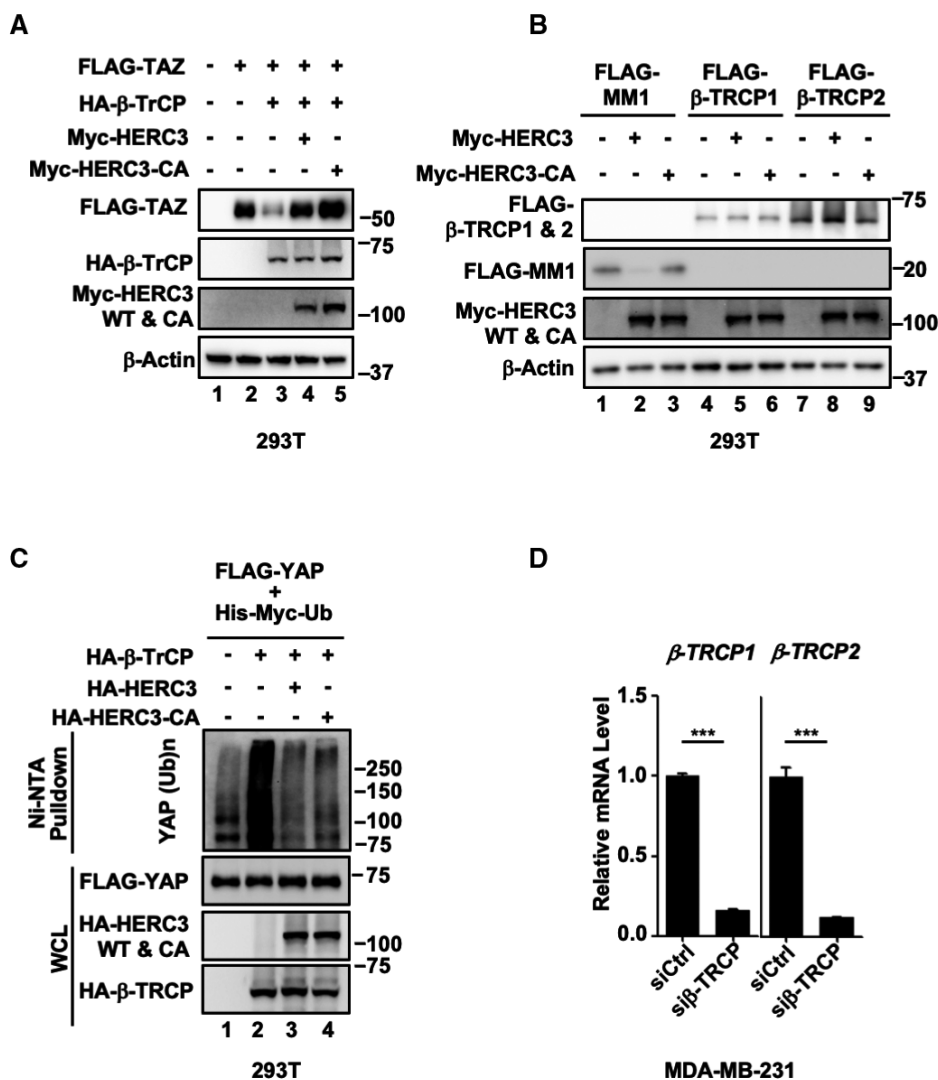

**Figure EV2. HERC3 blocks  $\beta$ -TrCP-mediated ubiquitination and proteasomal degradation of YAP/TAZ.**

A Western blots showing relevant protein levels in Fig 2B.

B HERC3 does not affect the protein levels of  $\beta$ -TrCP1 and  $\beta$ -TrCP2. HEK293T cells were transfected with expression plasmids for Myc-HERC3, Myc-HERC3-CA, FLAG-MM1, FLAG- $\beta$ -TrCP1, and FLAG- $\beta$ -TrCP2 as indicated. Cells were harvested 24 h post-transfection and subjected to Western blotting analysis with FLAG, Myc, and  $\beta$ -actin antibodies.

C HERC3 and HERC3-CA attenuate  $\beta$ -TrCP-mediated ubiquitination of YAP. HEK293T cells were transfected with expression plasmids for His-Myc-ubiquitin and FLAG-YAP, HA- $\beta$ -TrCP, HA-HERC3, or HA-HERC3-CA as indicated. A total of 24 h after transfection, ubiquitinated proteins were pulled down using Ni-NTA beads and the ubiquitinated YAP proteins were analyzed by using anti-FLAG antibody.

D  $\beta$ -TrCP1 and  $\beta$ -TrCP2 were efficiently knocked down by siRNA. Total mRNA levels of  $\beta$ -TrCP1 and  $\beta$ -TrCP2 in MDA-MB-231 cells were analyzed by qRT-PCR using primers specific to the indicated target gene. Data are shown as mean  $\pm$  SEM;  $n = 3$  biological replicates. Statistical analysis was performed using two-tailed Student's  $t$ -test. \*\*\* $P < 0.001$ .

Source data are available online for this figure.

**Figure EV3. HERC3 promotes tumor cell properties *in vitro*.**

- A–D Depletion of HERC3 decreases the ALDH<sup>+</sup> cell population. The ALDH activity in control and HERC3-deficient cells was analyzed by flow cytometric analysis by using ALDEFLUOR™ kit according to the manufacturer's instructions. (A) MDA-MB-231 cells. (B) Quantitation of ALDH<sup>+</sup> cell population in MDA-MB-231 cells. Data are shown as mean ± SEM; *n* = 3 biological replicates. \**P* < 0.05. (C) SUM159 cells. (D) Quantitation of ALDH<sup>+</sup> cell population in SUM159 cells. Data are shown as mean ± SEM; *n* = 3 biological replicates. \**P* < 0.05.
- E, F Depletion of HERC3 reduces the CD44<sup>+</sup>/CD24<sup>-</sup> cell population. (E) control and HERC3-deficient MDA-MB-231 cells (upper panel) or SUM159 cells (lower panel) were analyzed by flow cytometric analysis with CD24 and CD44 antibodies. (F) Graphical representation of CD44<sup>+</sup>/CD24<sup>-</sup> cell population. Data are shown as mean ± SEM; *n* = 3 biological replicates. Statistical analysis was performed using two-tailed Student's *t*-test. \**P* < 0.05. \*\**P* < 0.01.
- G TAZ-4SA/YAP-5SA rescue shHERC3-mediated repression of CTGF-Luc reporter activity. HERC3-deficient cells with or without ectopic expression of TAZ-4SA/YAP-5SA and shCtrl MDA-MB-231 cells were transfected with CTGF-Luc and Renilla-Luc. Cells were then harvested and subjected to luciferase assay as described in Fig 1C. Data are shown as mean ± SEM; *n* = 3 biological replicates. Statistical analysis was performed using two-tailed Student's *t*-test. \*\*\**P* < 0.001.
- H TAZ-4SA/YAP-5SA rescue shHERC3-mediated repression of YAP/TAZ target gene transcription. Total mRNA levels of *CTGF* and *ANKRD1* were analyzed by qRT-PCR using primers specific to the indicated target genes. Data are shown as mean ± SEM; *n* = 3 biological replicates. Statistical analysis was performed using two-tailed Student's *t*-test. \*\*\**P* < 0.001.
- I TAZ-4SA/YAP-5SA reverse the inhibitory effect of HERC3 depletion on cell proliferation. MDA-MB-231 cells expressing shHERC3 and/or TAZ-4SA/YAP-5SA were analyzed for indicated days by CCK8 assay as described in the Materials and Methods. Data are shown as mean ± SEM; *n* = 3 biological replicates. \*\*\**P* < 0.001.

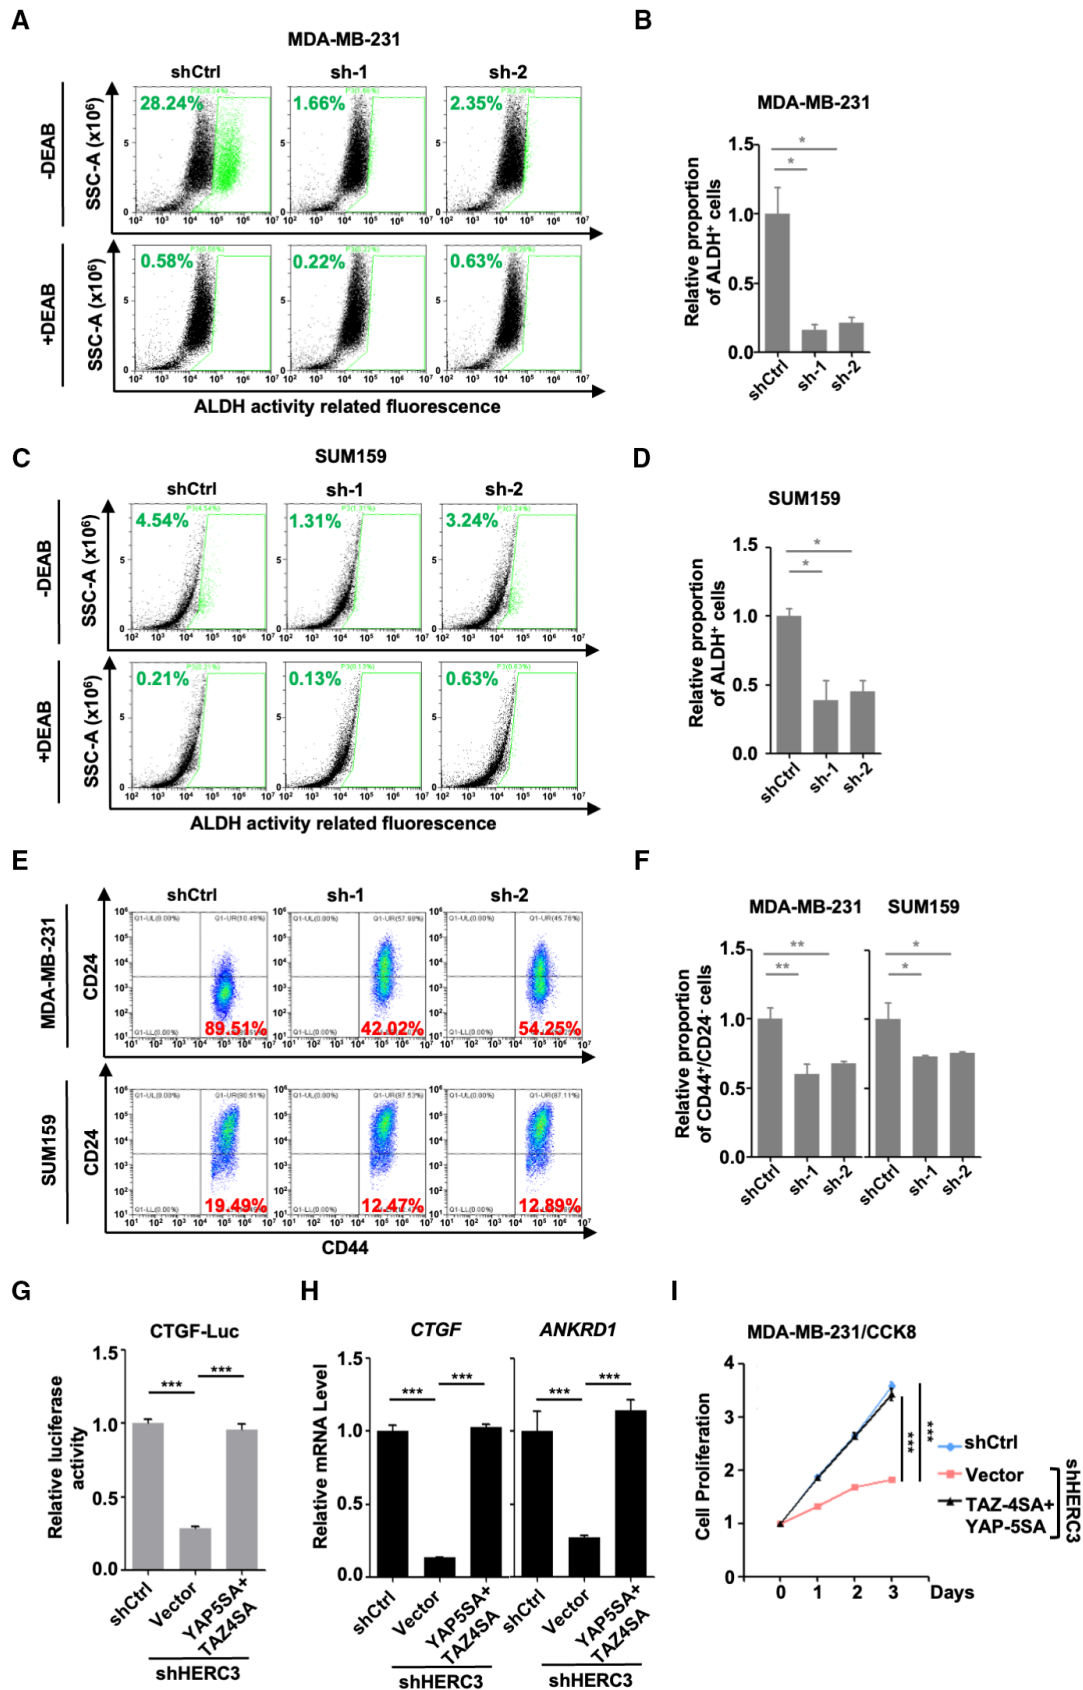

Figure EV3.

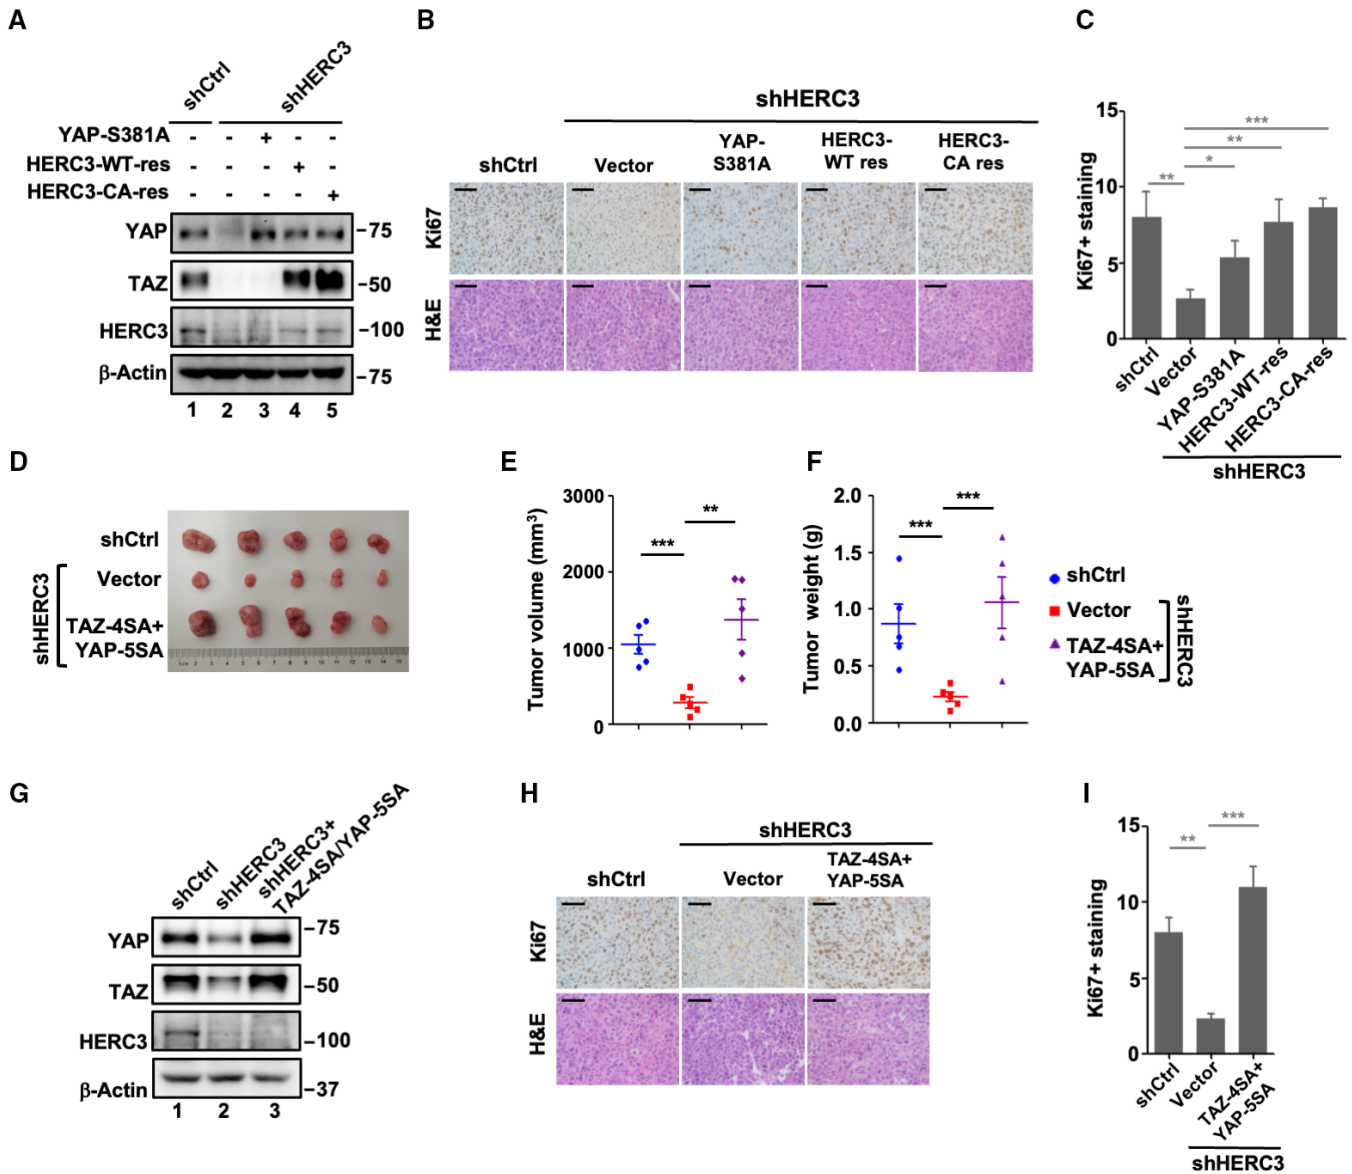

**Figure EV4. HERC3 knockdown represses mammary tumorigenesis and metastasis.**

- A RNAi-resistant HERC3 rescues YAP/TAZ protein levels in HERC3-deficient tumors. Protein levels of YAP/TAZ in tumors (Fig 5L) were analyzed by Western blotting with appropriate antibodies.
- B, C RNAi-resistant HERC3 and YAP-S381A rescue cell proliferation in HERC3-deficient xenograft tumors. (B) Representative H&E staining and Ki67 expression from each group's tumor tissues from Fig 5L. Scale bars, 50  $\mu$ m. (C) Graphical representation of Ki67<sup>+</sup> scores from Panel B. Data are represented as the mean  $\pm$  SEM;  $n = 3$  biological replicates. Statistical analysis was performed using two-tailed Student's *t*-test. \* $P < 0.05$ . \*\* $P < 0.01$ . \*\*\* $P < 0.001$ .
- D–F TAZ-4SA/YAP-5SA reverse the inhibitory effect of HERC3 depletion in tumorigenicity. Subcutaneous tumors carrying HERC3 deficiency together with TAZ-4SA/YAP-5SA expression and control were dissected and analyzed at 6 weeks after cell implantation. (D) Tumor morphology. (E) Tumor volume. (F) Tumor weight. Data are shown as mean  $\pm$  SEM;  $n = 5$  biological replicates. Statistical analysis was performed using two-tailed Student's *t*-test. \*\* $P < 0.01$ . \*\*\* $P < 0.001$ .
- G TAZ-4SA and YAP-5SA are stably expressed at a comparable level to endogenous YAP-TAZ in HERC3-deficient tumors. Protein levels in tumors (Fig EV4D) were analyzed by Western blotting with appropriate antibodies.
- H, I TAZ-4SA/YAP-5SA reverse the inhibitory effect of HERC3 depletion on Ki67 expression in xenograft tumors. (H) Representative H&E staining and Ki67 expression from each group's tumor tissues from Fig EV4D. Scale bars, 50  $\mu$ m. (I) Graphical representation of Ki67<sup>+</sup> scores from Panel B. Data are represented as the mean  $\pm$  SEM.  $n = 3$  biological replicates. Statistical analysis was performed using two-tailed Student's *t*-test. \*\* $P < 0.01$ . \*\*\* $P < 0.001$ .

Source data are available online for this figure.

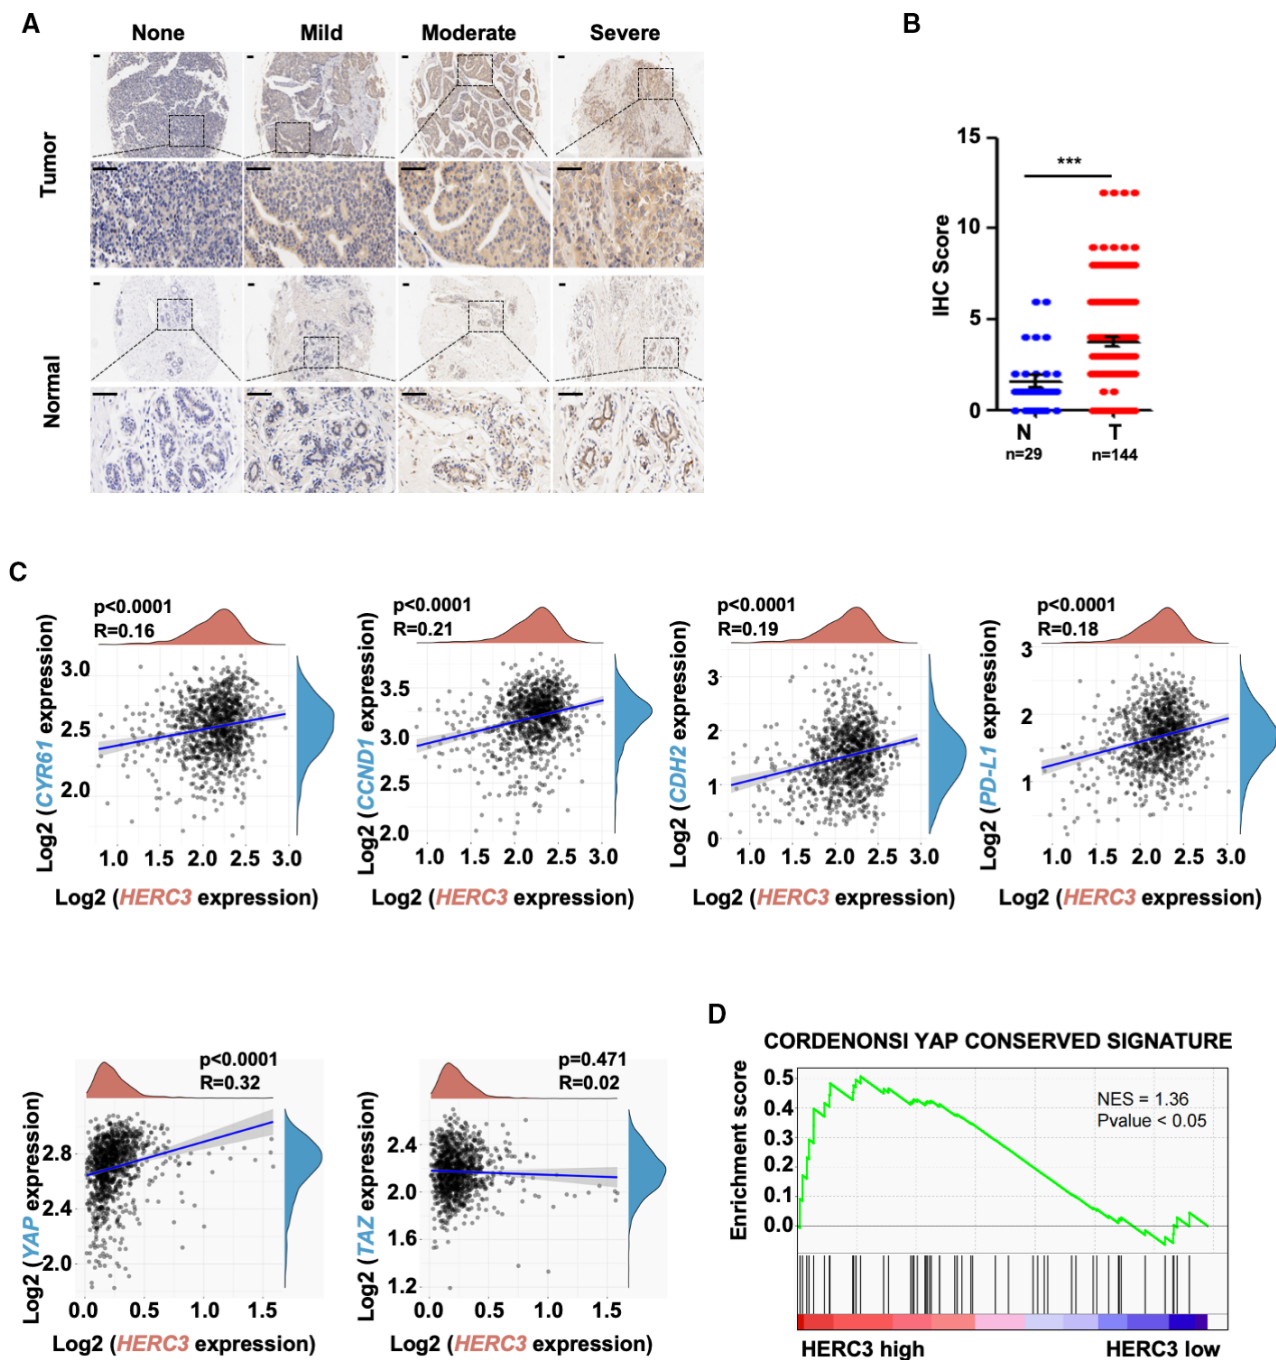

**Figure EV5. HERC3 is positively correlated with poor prognosis in breast cancer.**

- A HERC3 is highly expressed in breast cancer specimens. Representative images of IHC staining of HERC3 in breast tumor samples and adjacent normal tissues of tissue microarrays (Bioitech). Scale bars, 50  $\mu$ m.
- B Graphical representation of scoring performed on IHC staining in Panel A. Data are represented as the mean  $\pm$  SEM.  $n = 3$  biological replicates. Statistical analysis was performed using two-tailed Student's  $t$ -test. \*\*\* $P < 0.001$ .
- C Expression level of HERC3 is positively correlated with those of YAP/TAZ target genes (e.g., *CYR61*, *CCND1*, *CDH2*, and *PD-L1*) in breast cancer patients, as analyzed using TCGA database.
- D YAP conserved signatures were enriched in breast cancer samples with high HERC3 levels. Transcriptome-wide effects of HERC3 on YAP conserved signature genes in TCGA database were evaluated by GSEA analysis. Red, upregulated genes; blue, downregulated genes. NES = 1.36,  $P$ -value < 0.05.
